# Supplementary material for: Obesity-Related Brain Cholinergic System Impairment in High-Fat-Diet-Fed Rats
Source: MDPI journal article supplement (doi:10.3390/nu14061243), 2022-03-15
Supplement: s1 [file s1]

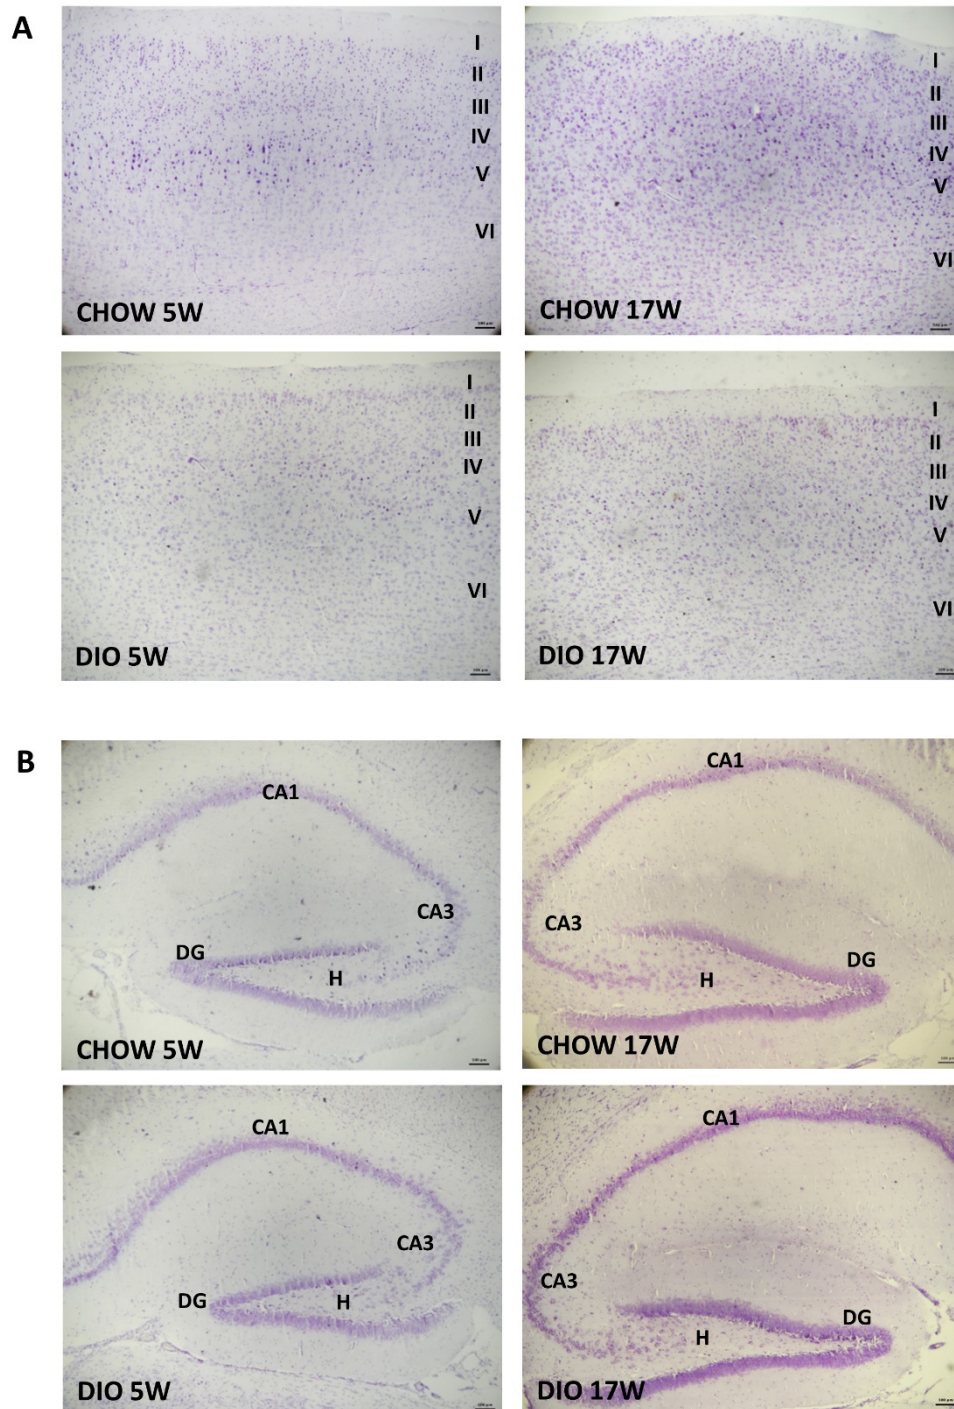

**Supplementary Figure S1.** Sections of rat frontal cortex (**A**) and hippocampus (**B**) stained with cresyl violet. Roman numerals indicate the layers of cerebral cortex. CA1: field CA1 of hippocampus; CA3: field CA3 of hippocampus; DG: dentate gyrus; H: hilus of the dentate gyrus. Scale bar: 100  $\mu$ m.

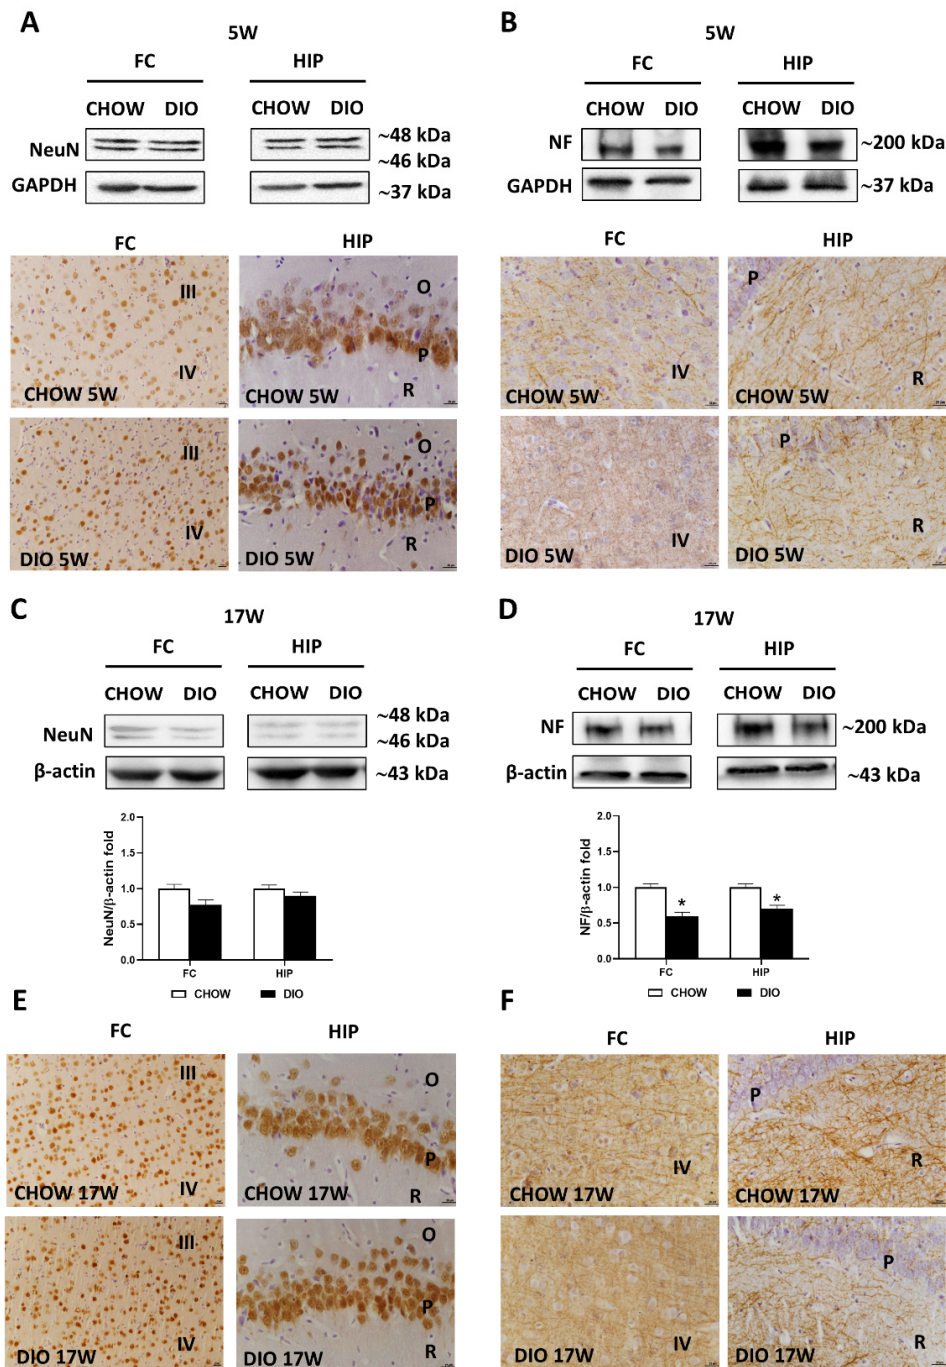

**Supplementary Figure S2.** Immunoblotting and immunoreaction of neuronal nuclei (NeuN) and neurofilament 200kDa (NF). Lysates and representative pictures in the frontal cortex (FC), and hippocampus (HIP) from rats fed with a standard diet (CHOW) and high-fat diet (DIO) for 5 weeks, were immunoblotted and stained using specific anti-NeuN (**A**) and anti-NF (**B**). Lysates and representative pictures in FC, and HIP from CHOW and DIO rats after 17 weeks were immunoblotted and stained using specific anti-NeuN (**C**, **E**) and anti-NF (**D**, **F**). Bar graphs indicate the densitometric analysis using CHOW as control, and β-actin was used as a reference loading protein. Data are mean ± S.E.M. \*  $p < 0.05$  vs. age-matched CHOW. III, IV: third and fourth layer of frontal cortex; O: *stratum oriens*; P: pyramidal cells; R: *stratum radiatum*. Scale bar: 25 μm.
